# Supplementary material for: Electrokinetically driven reversible banding of colloidal particles near the wall
Source: Royal Society of Chemistry journal article supplement (doi:10.1039/c3lc51341f), 2014-01-01
Supplement: c3lc51341f.pdf [file c3lc51341f.pdf]

*Supplementary Material*

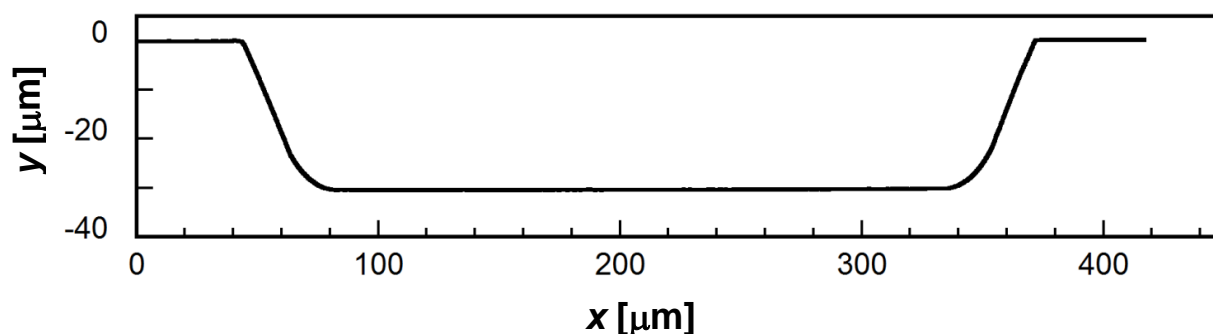

Profilometry scan (data courtesy of J. P. Alarie, Department of Chemistry, University of North Carolina at Chapel Hill) of the trench of the channel used in these experiments before sealing. The channel was isotropically wet-etched in a fused-silica substrate. Note that the vertical scale is magnified by 200% compared with the horizontal scale.
